# Supplementary material
Source: PubMed Central journal article supplement (PMC3513743)
Supplement: CJN.03130312_CJN03130312SupplementaryData.pdf [file CJN.03130312_CJN03130312SupplementaryData.pdf]

Tammy M. Brady, MD, MHS<sup>1</sup>; Michael F. Schneider, MS<sup>2</sup>, Joseph T. Flynn, MD, MS<sup>3</sup>, Christopher Cox, PhD<sup>2</sup>, Joshua Samuels, MD, MPH<sup>4</sup>, Jeffrey Saland, MD<sup>5</sup>, Colin T. White, MD<sup>6</sup>, Susan Furth, MD, PhD<sup>7</sup>, Bradley A. Warady, MD<sup>8</sup>, Mark Mitsnefes, MD, MS<sup>9</sup>

**Author Affiliations:**

<sup>1</sup> Johns Hopkins University, Department of Pediatrics, Division of Pediatric Nephrology

<sup>2</sup> Johns Hopkins Bloomberg School of Public Health, Department of Epidemiology

<sup>3</sup> Seattle Children's Hospital, Department of Pediatrics, Division of Nephrology

<sup>4</sup> University of Texas – Houston, Department of Pediatrics, Pediatric Nephrology & Hypertension

<sup>5</sup> The Mount Sinai School of Medicine, Department of Pediatrics, Division of Nephrology and Hypertension

<sup>6</sup> BC Children's Hospital, Department of Pediatrics, Division of Nephrology

<sup>7</sup> Children's Hospital of Philadelphia, Division of Nephrology

<sup>8</sup> Children's Mercy Hospitals and Clinics, Division of Nephrology

<sup>9</sup> Cincinnati Children's Hospital Medical Center, Division of Nephrology
